# Supplementary material
Source: ML conference proceedings conference paper supplement (https://proceedings.neurips.cc/paper_files/paper/2021/hash/3413ce14d52b87557e87e2c1518c2cbe-Abstract.html)
Supplement: Supplementary file 1 [file 3413ce14d52b87557e87e2c1518c2cbe-Supplemental.zip]

Archive with 2 entries (2 files):
- CPAE_Supplementary_Materials.pdf
- CPAE_video.mp4
